# Supplementary material
Source: PubMed Central journal article supplement (PMC9849128)

---

**Supplementary information**

---

**Cas12a2 elicits abortive infection through  
RNA-triggered destruction of dsDNA**

---

In the format provided by the  
authors and unedited

a

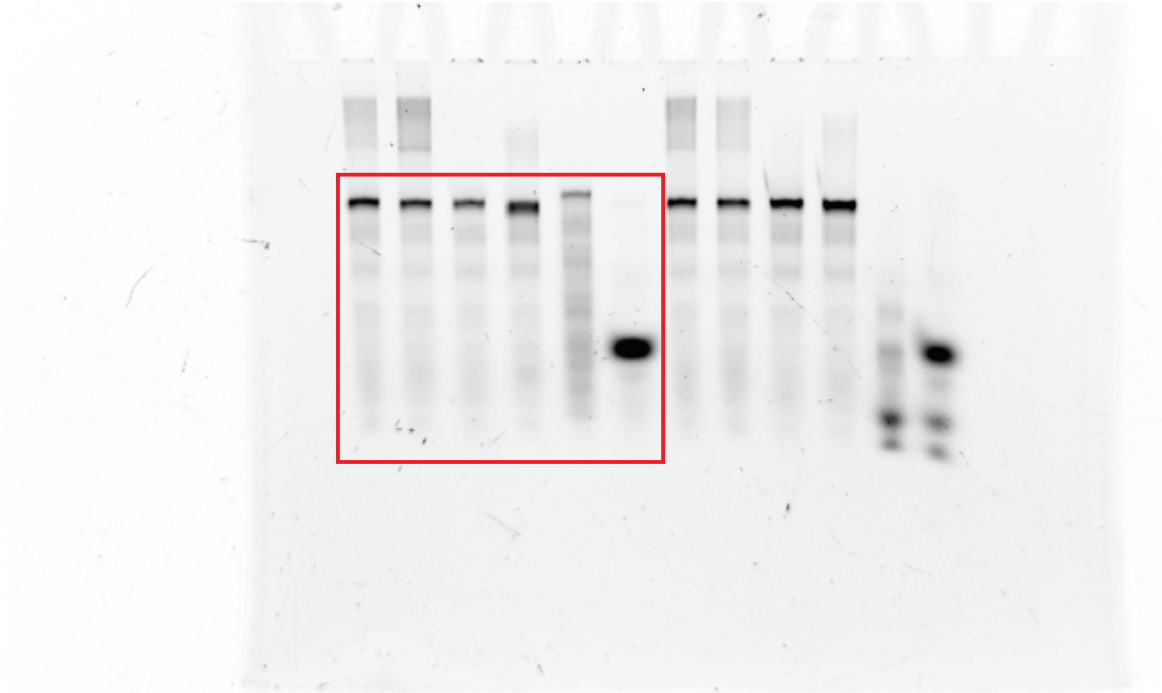

b

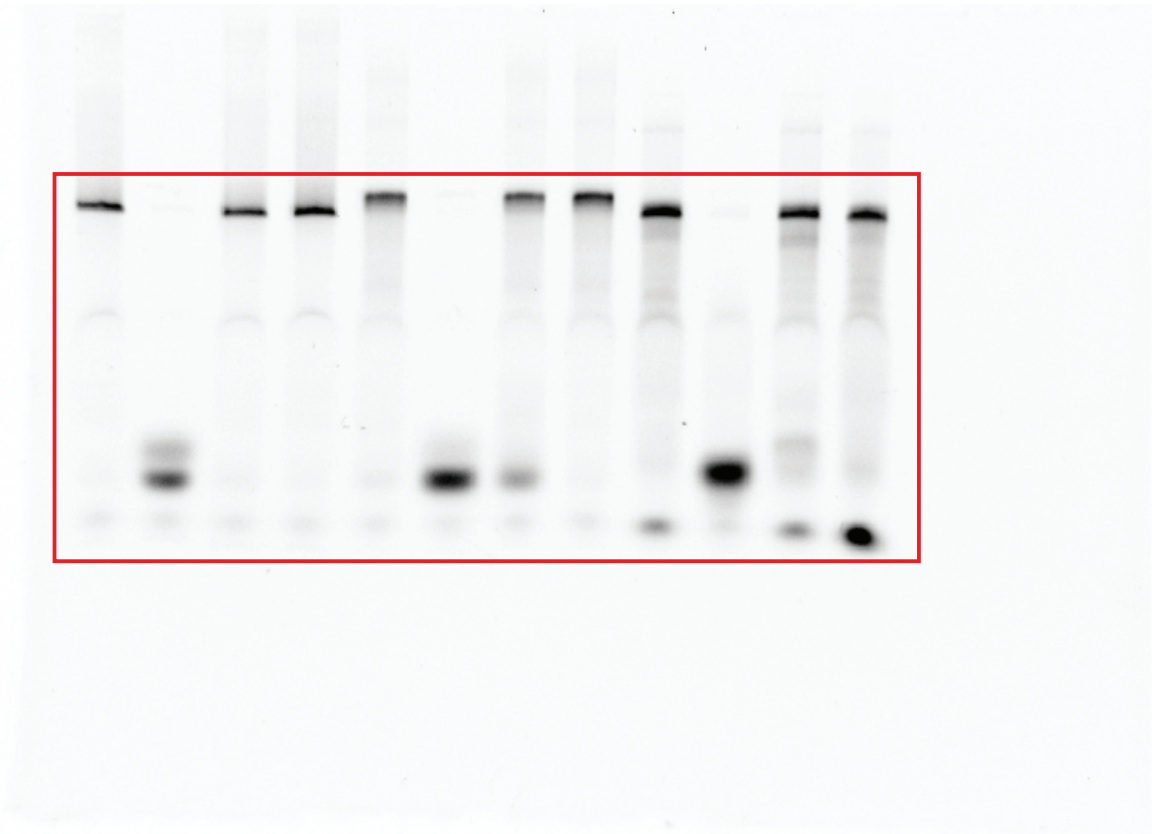

c

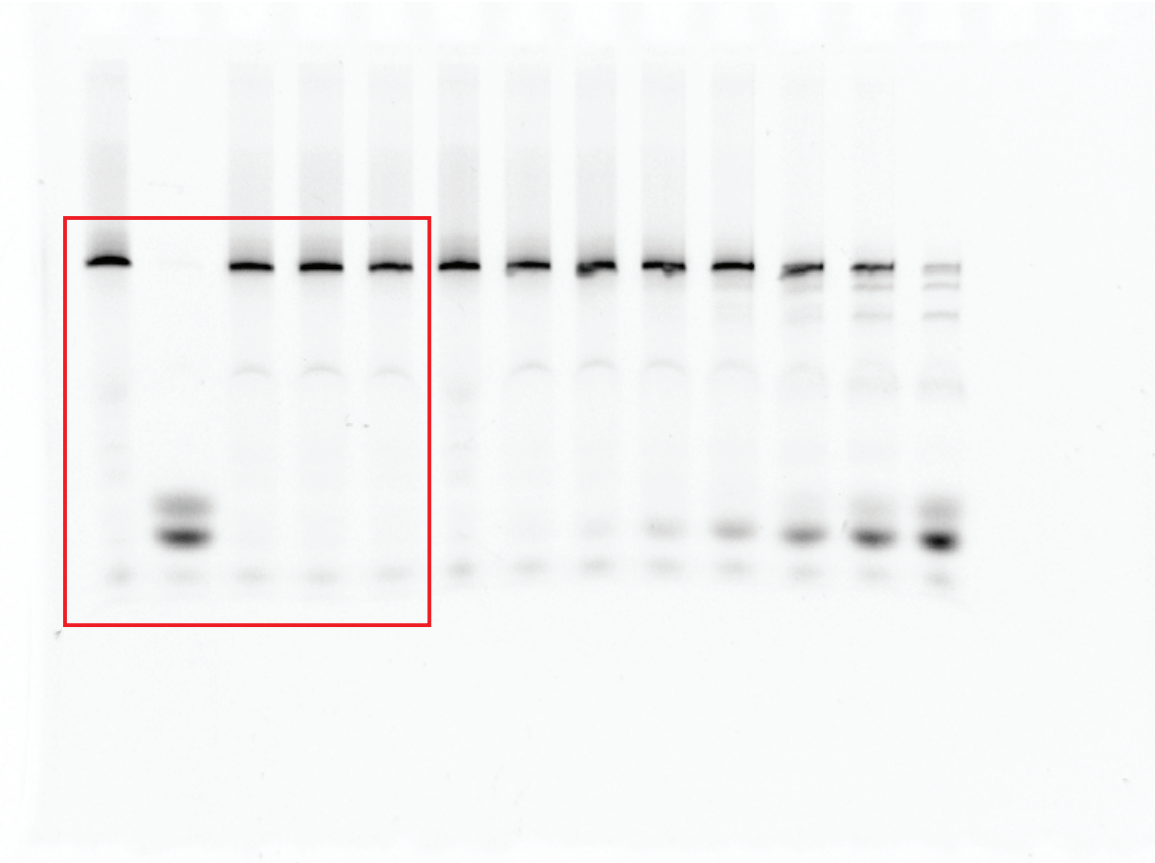

d

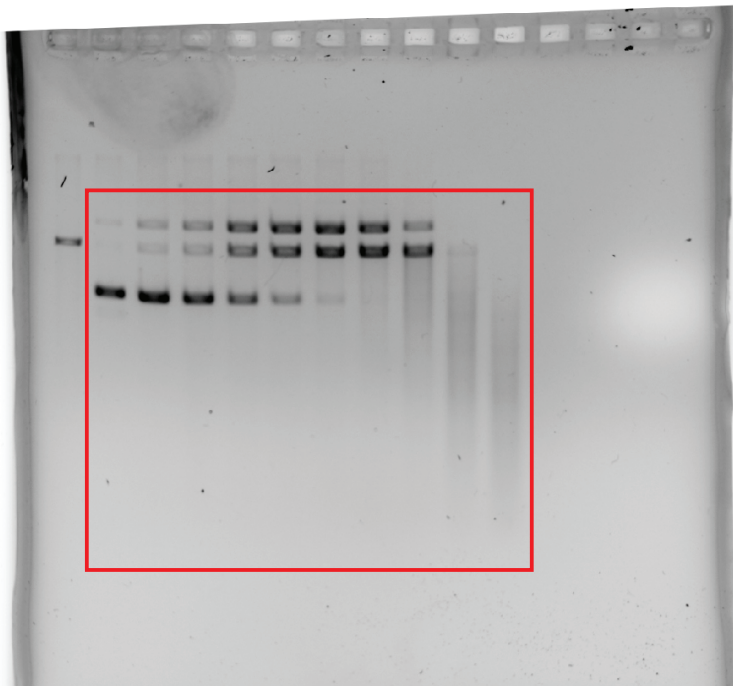

e

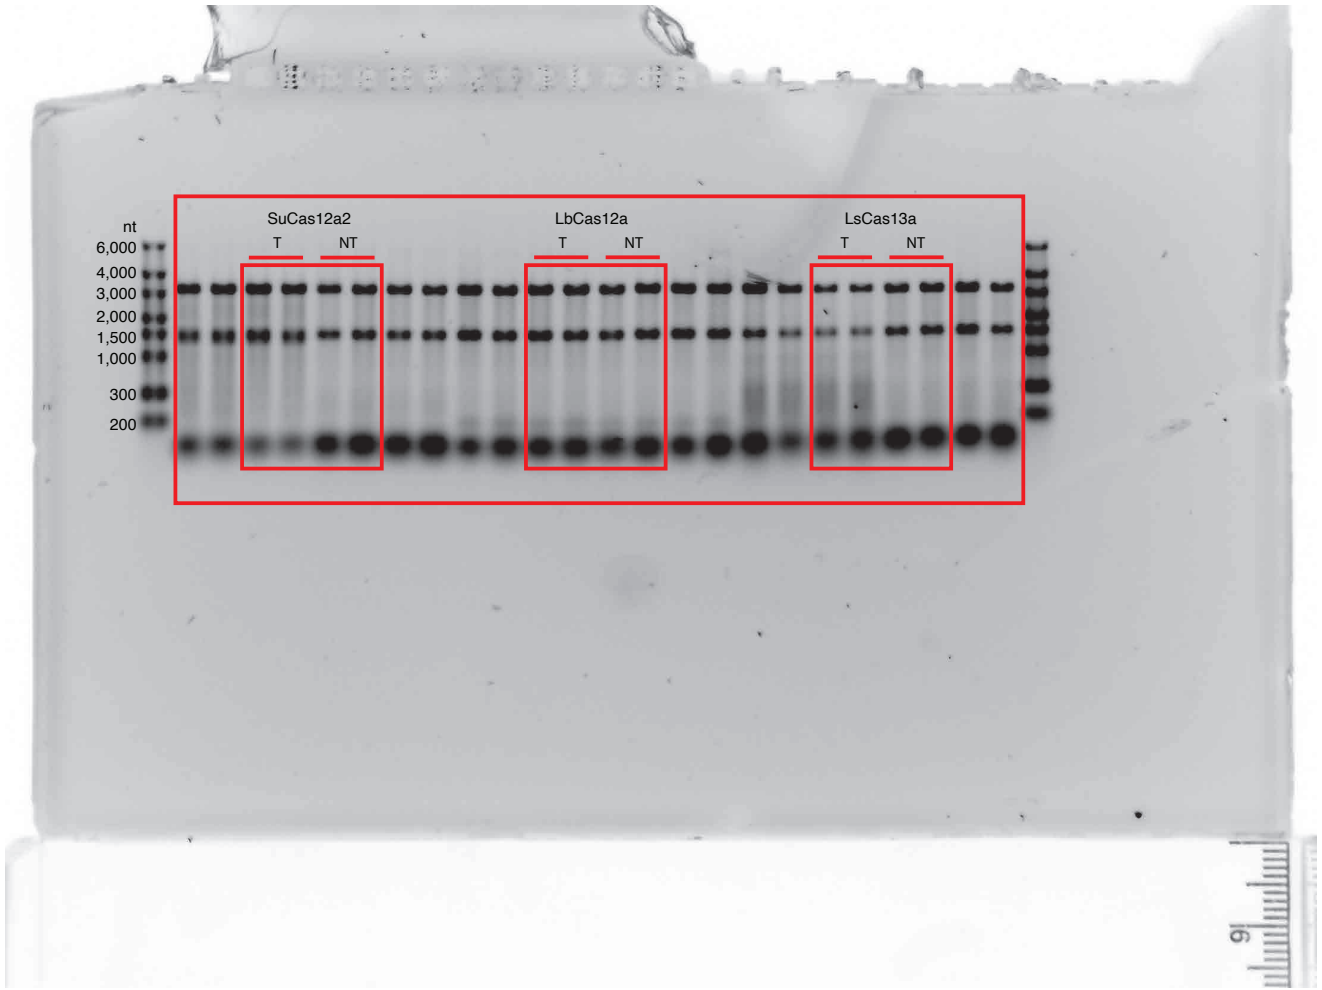

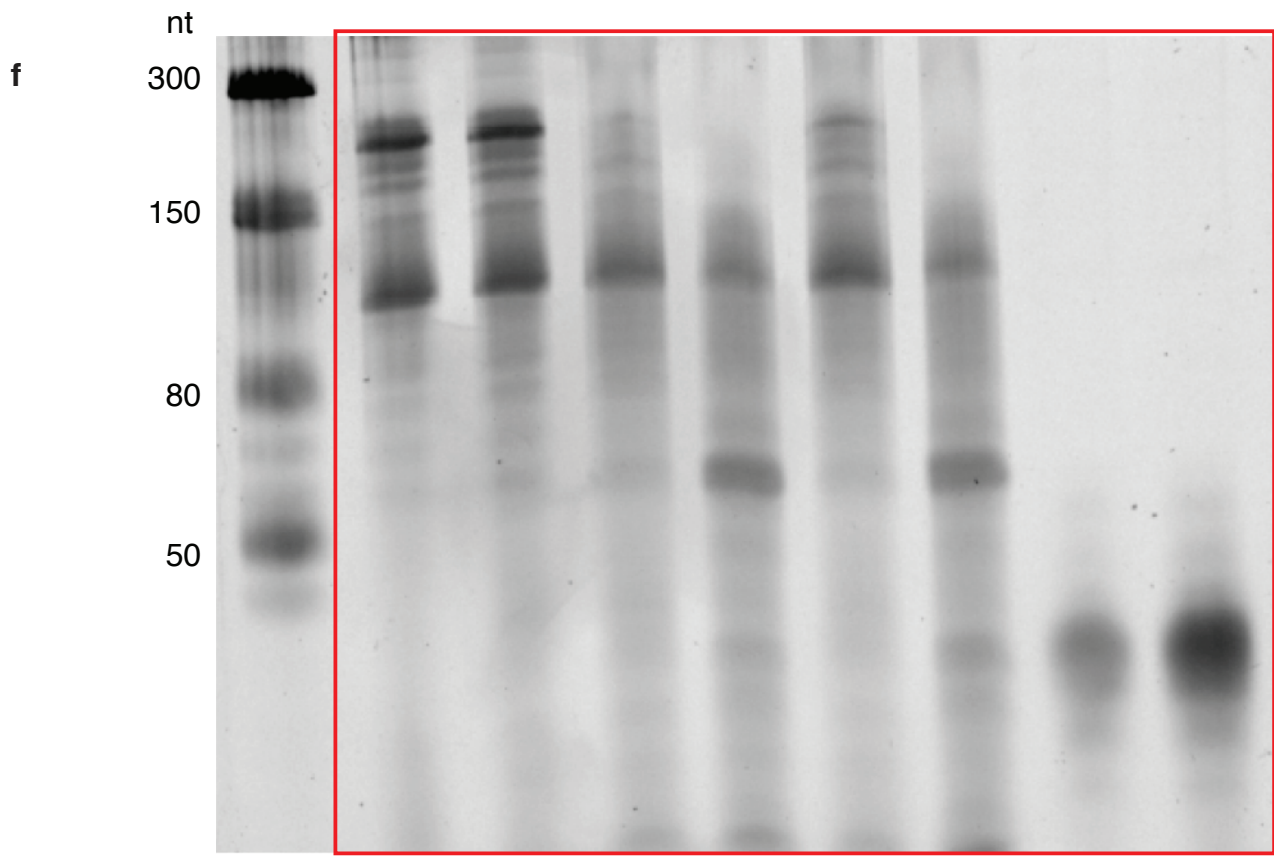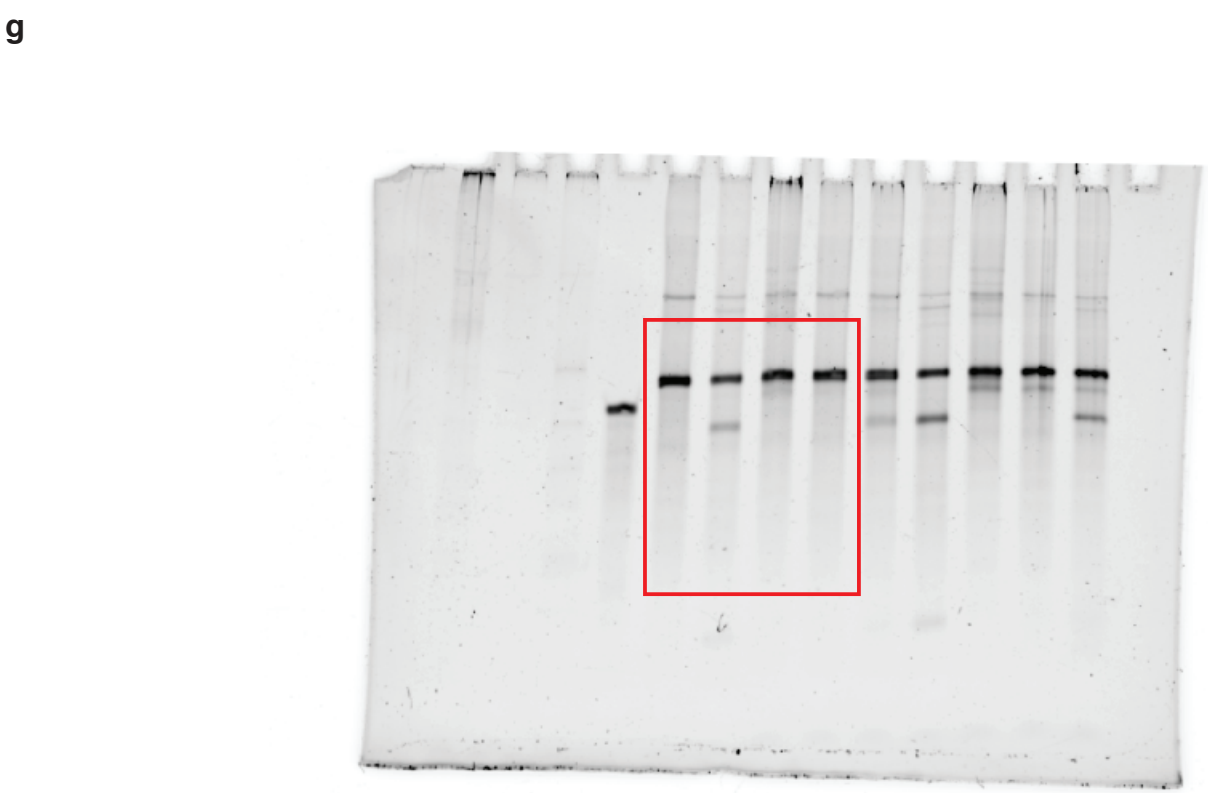

h

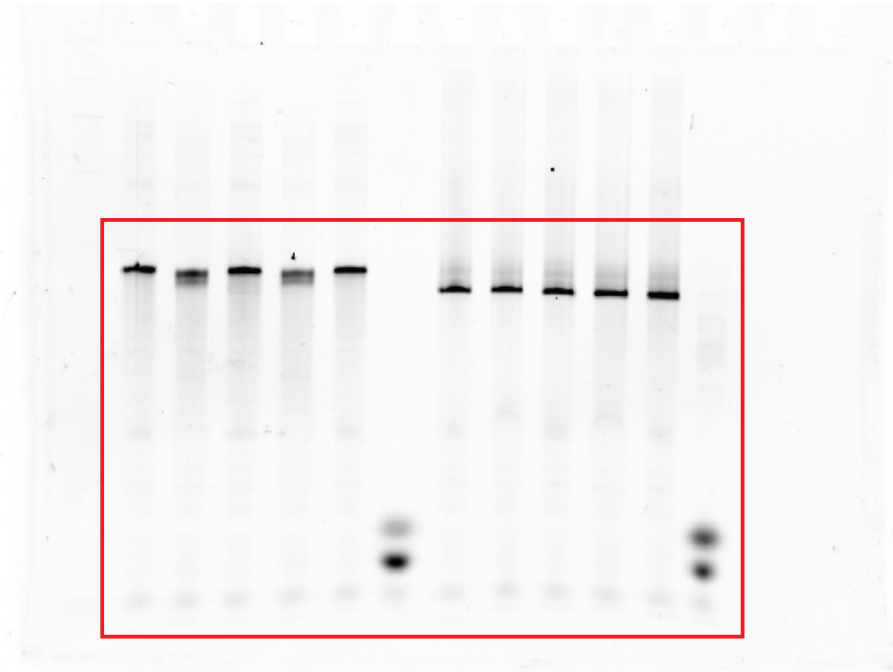

i

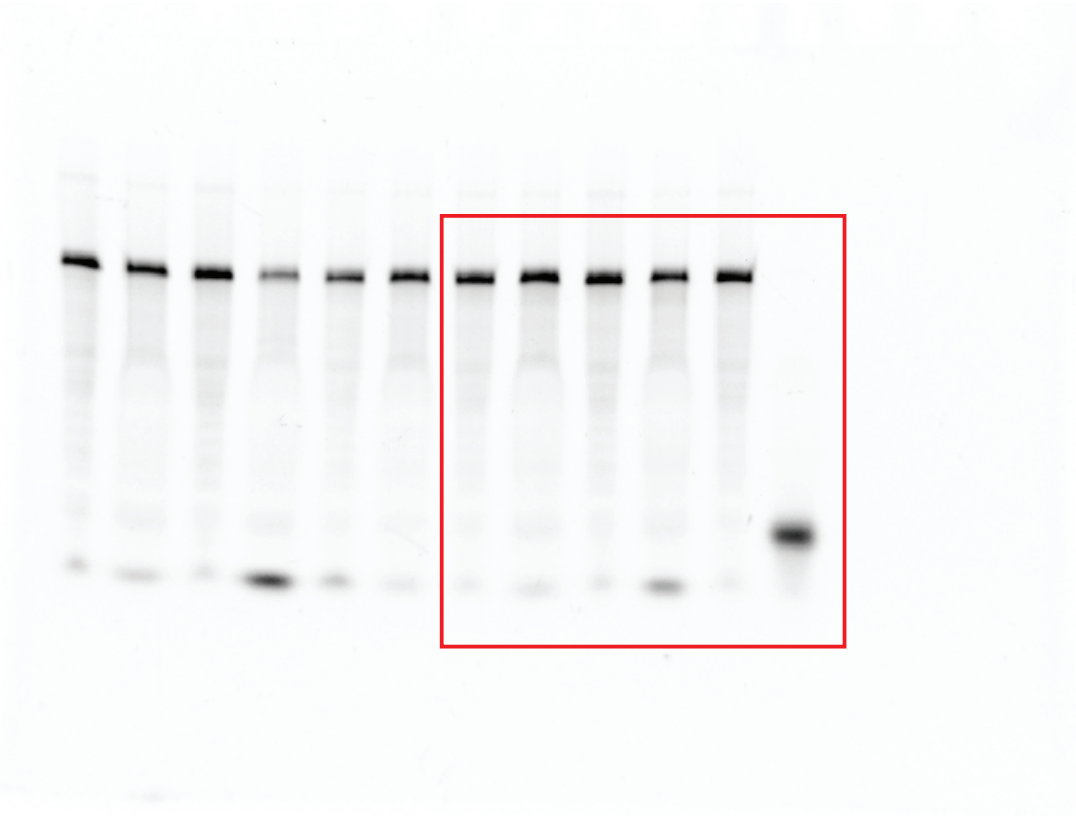

j

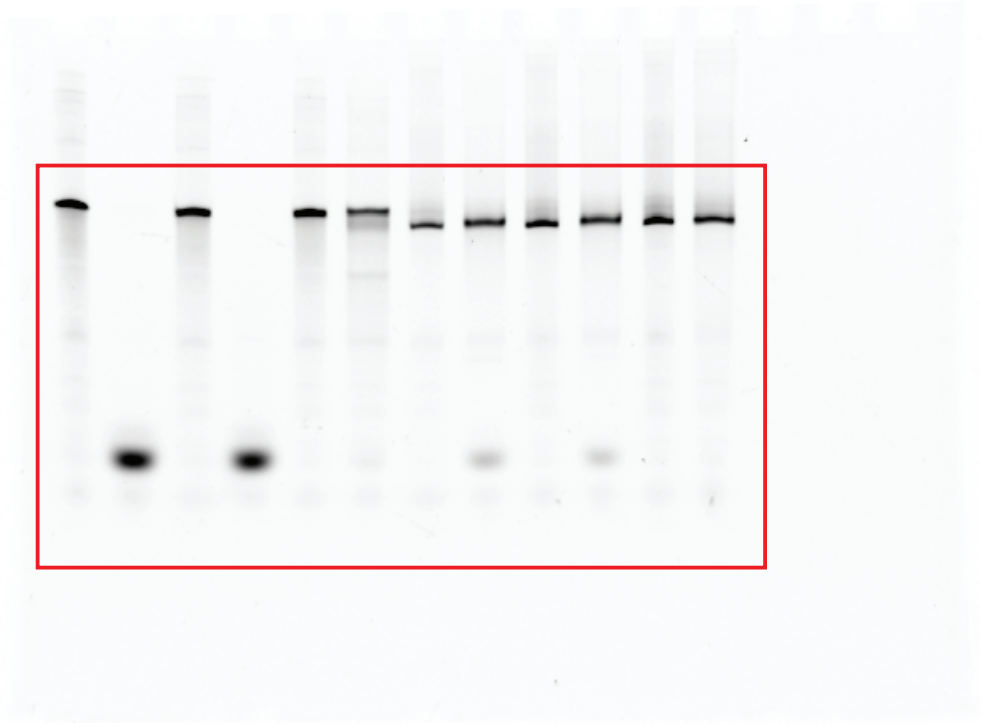

k

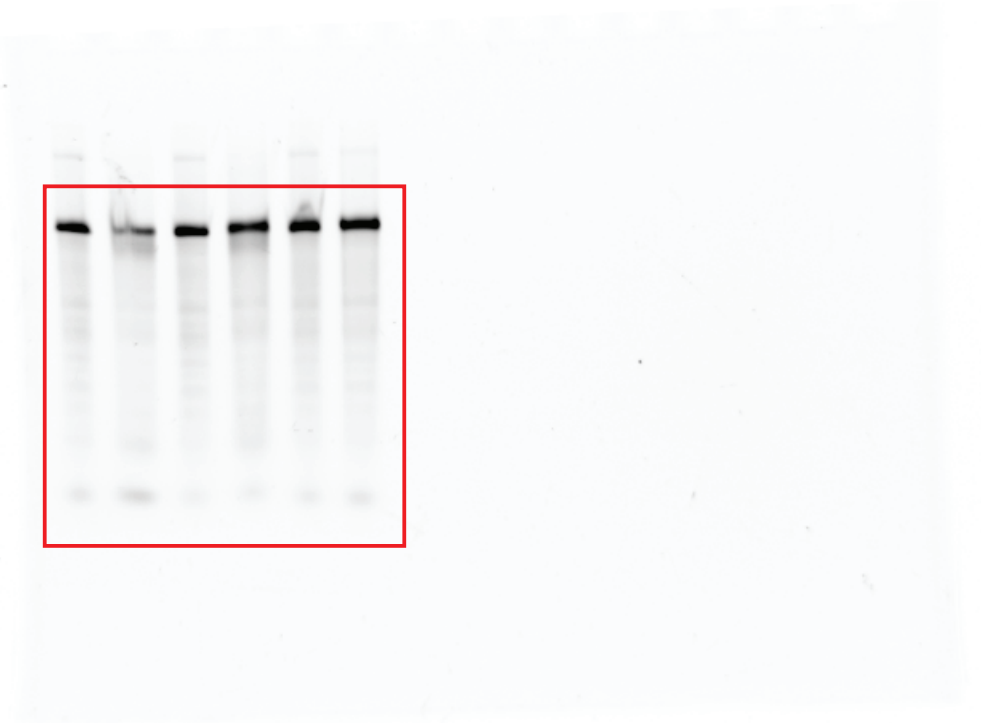

o

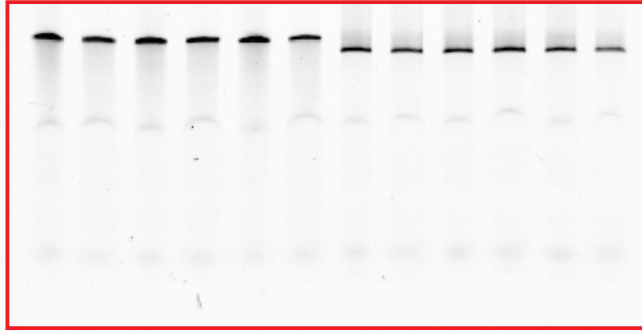

p

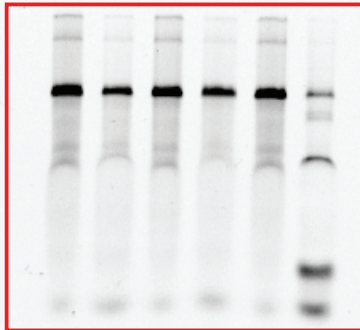



q

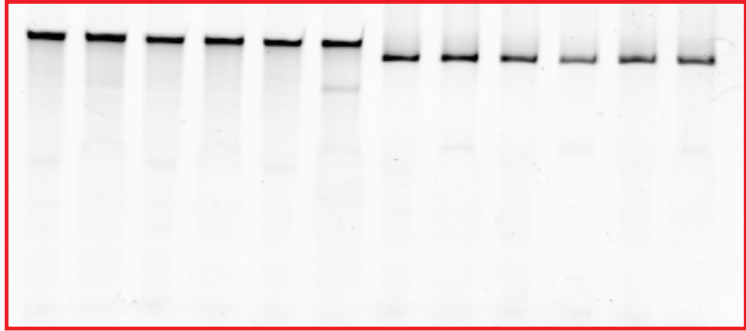

r

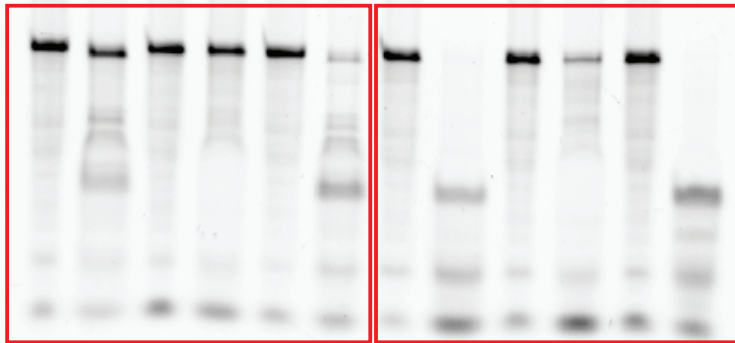

s

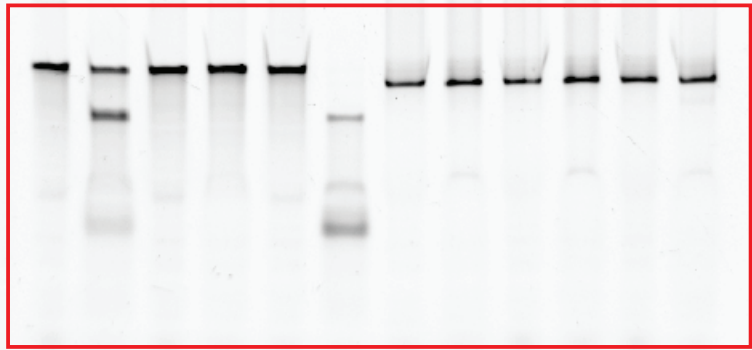

t

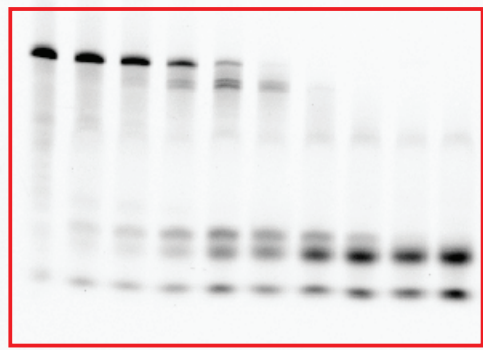

u

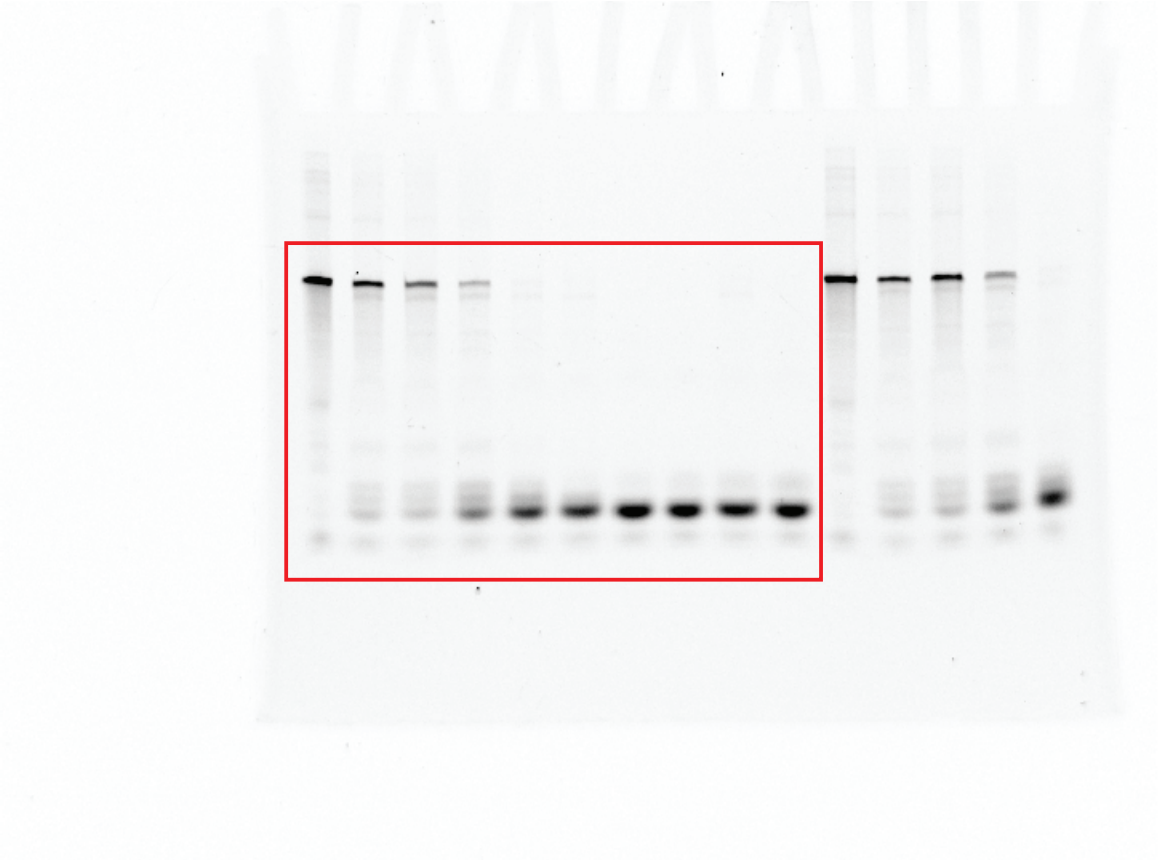

v

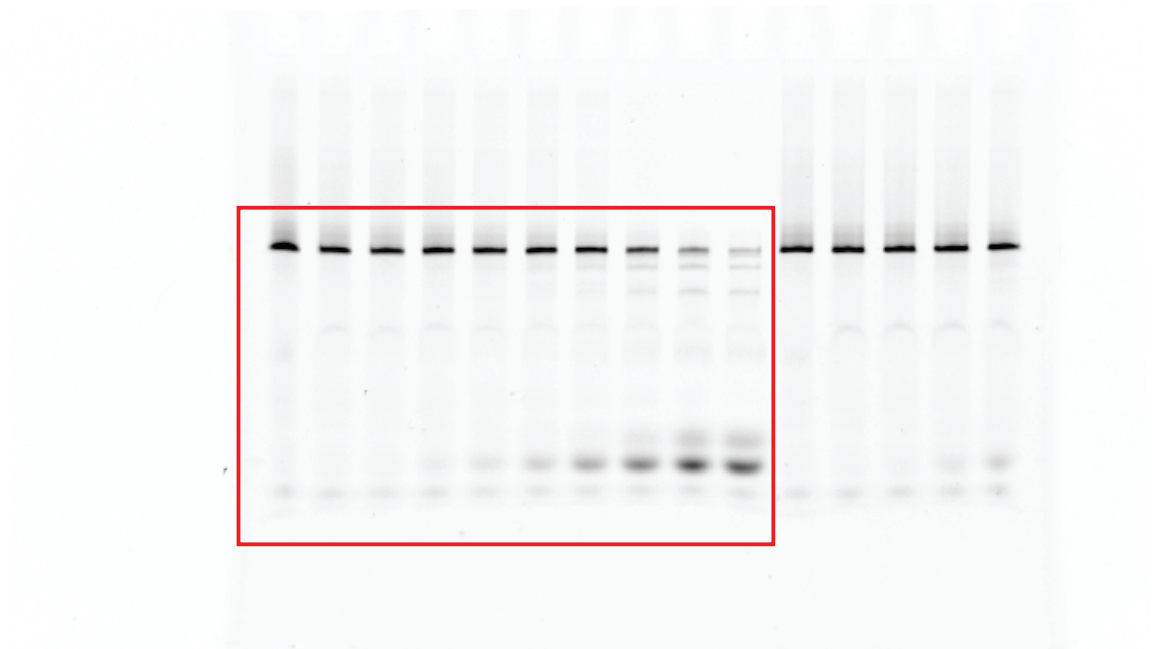

w

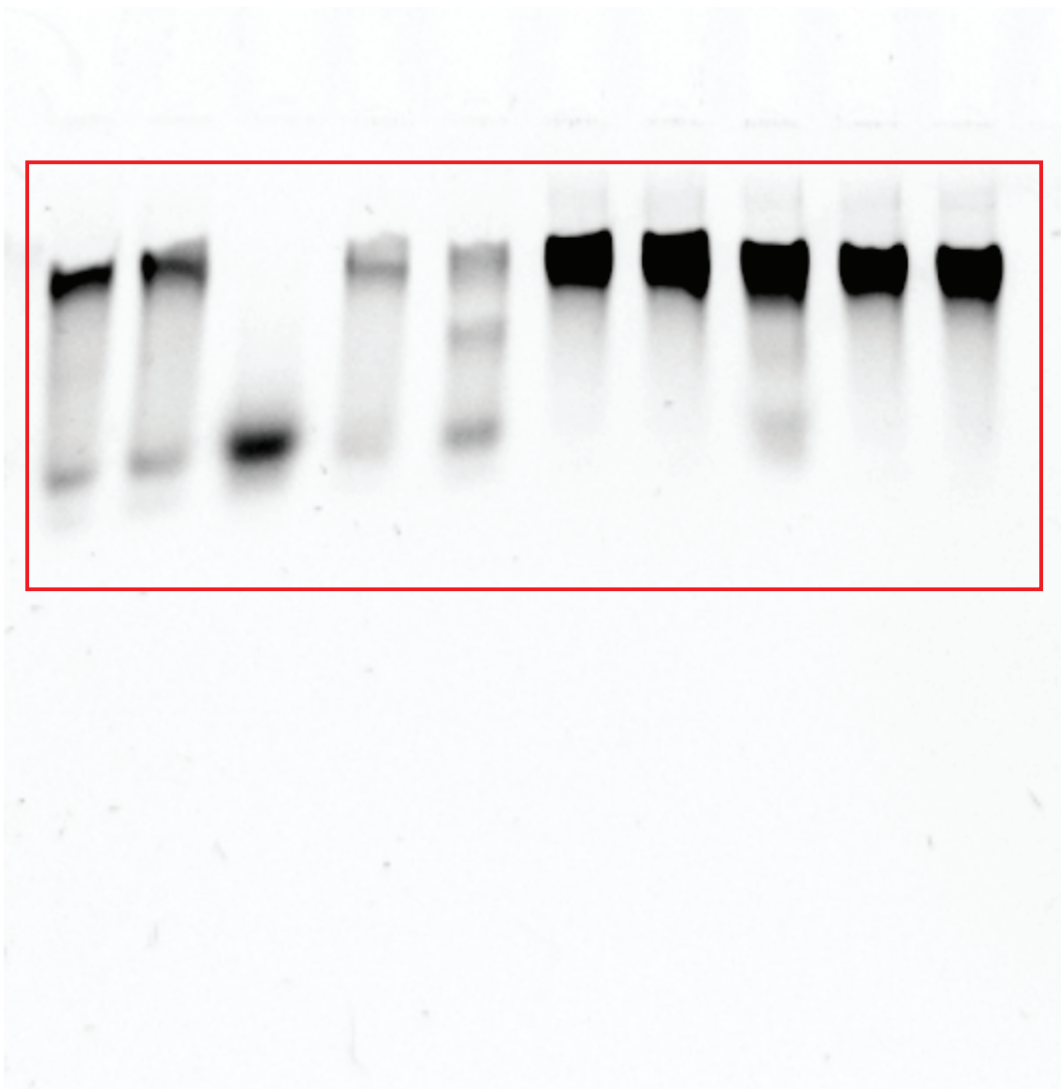

x

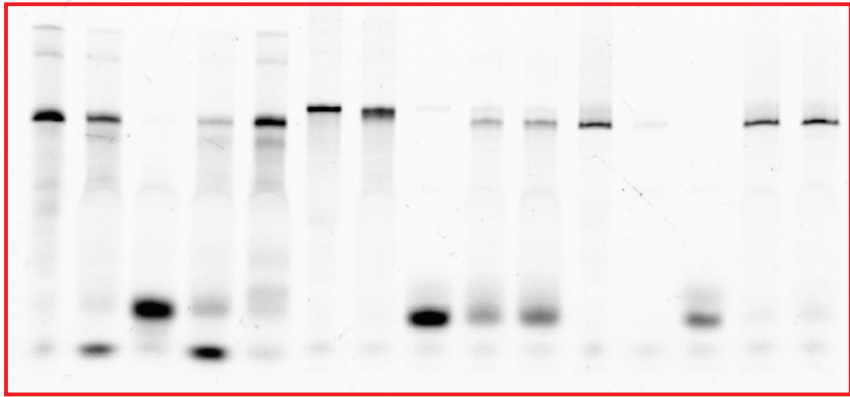

y

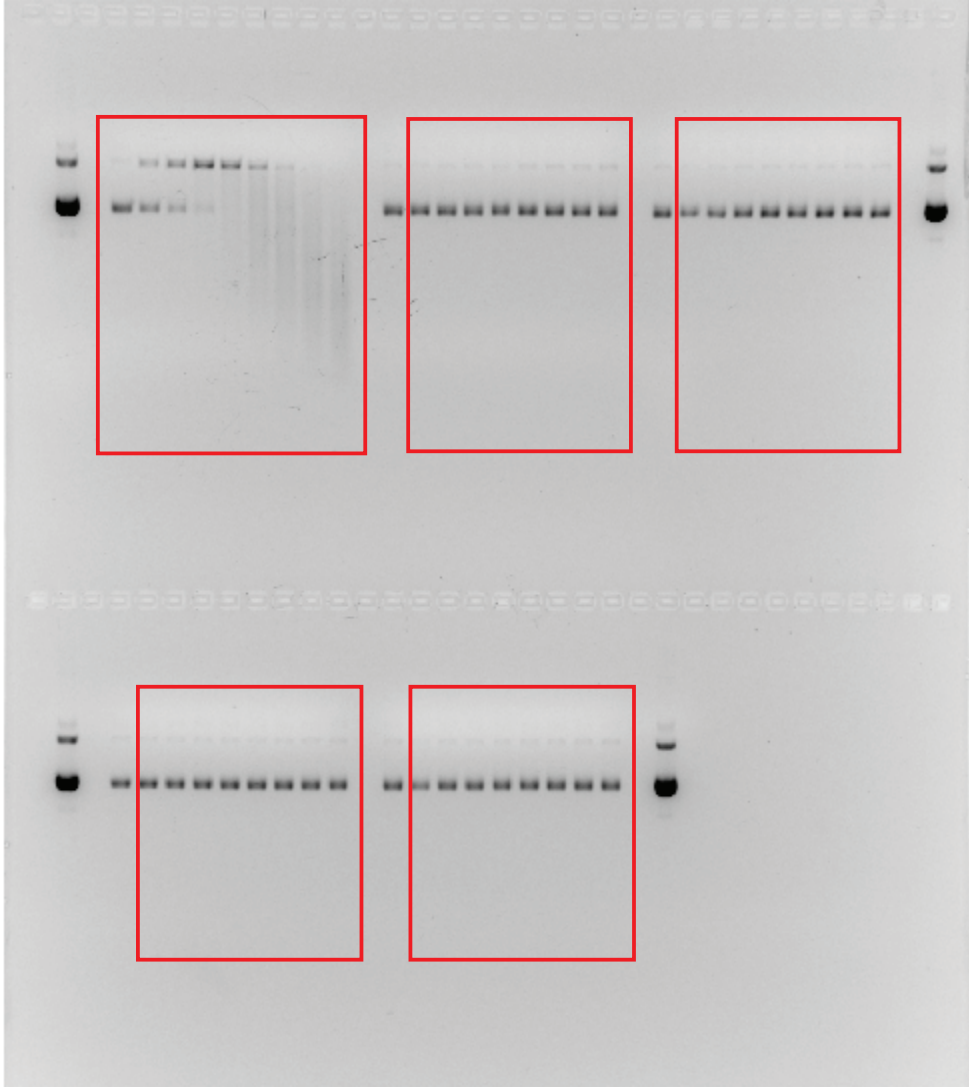

z

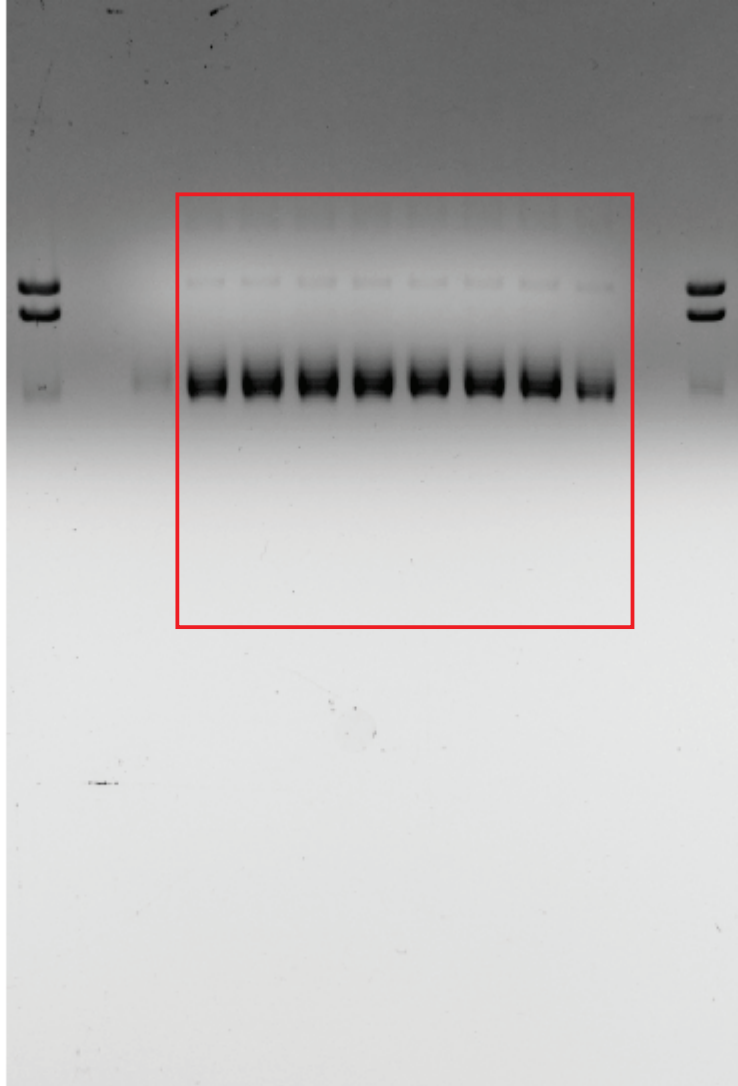

za

kb  
5  
4  
3  
2  
1.5  
0.3  
0.2  
0.75

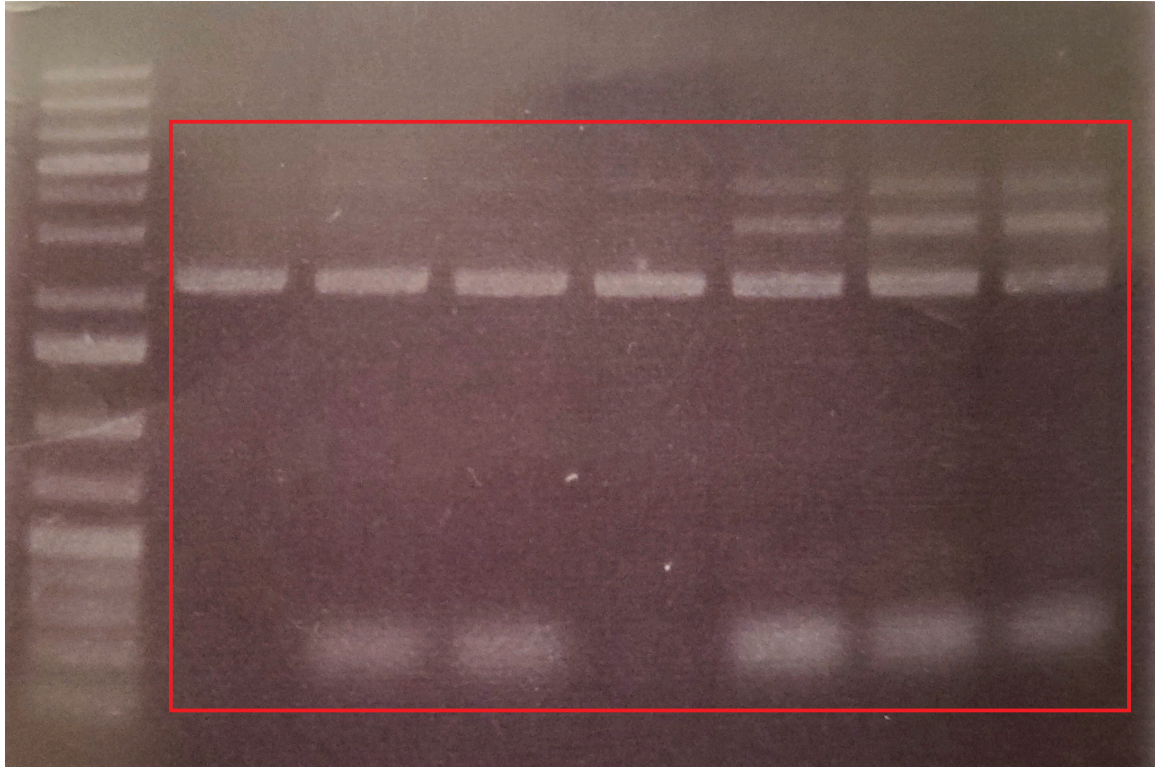

zb

kDa  
135  
100  
75

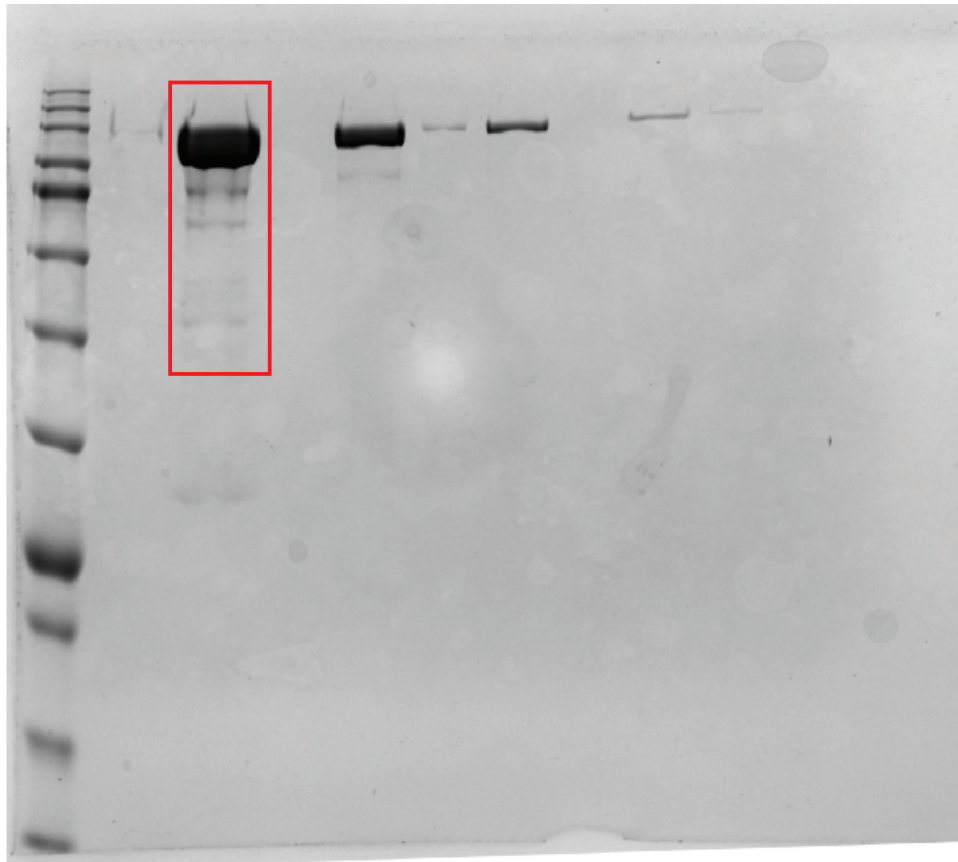



zC

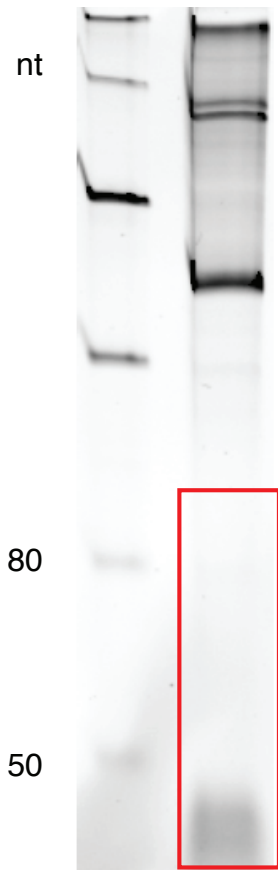

Supplement: 41586_2022_5559_MOESM1_ESM.pdf [file 41586_2022_5559_MOESM1_ESM.pdf]
